# Supplementary material
Source: publisher site journal article supplement (https://www.dovepress.com/article/426882)
Supplement: Supplementary file 1 [file get_supplementary_file.php]

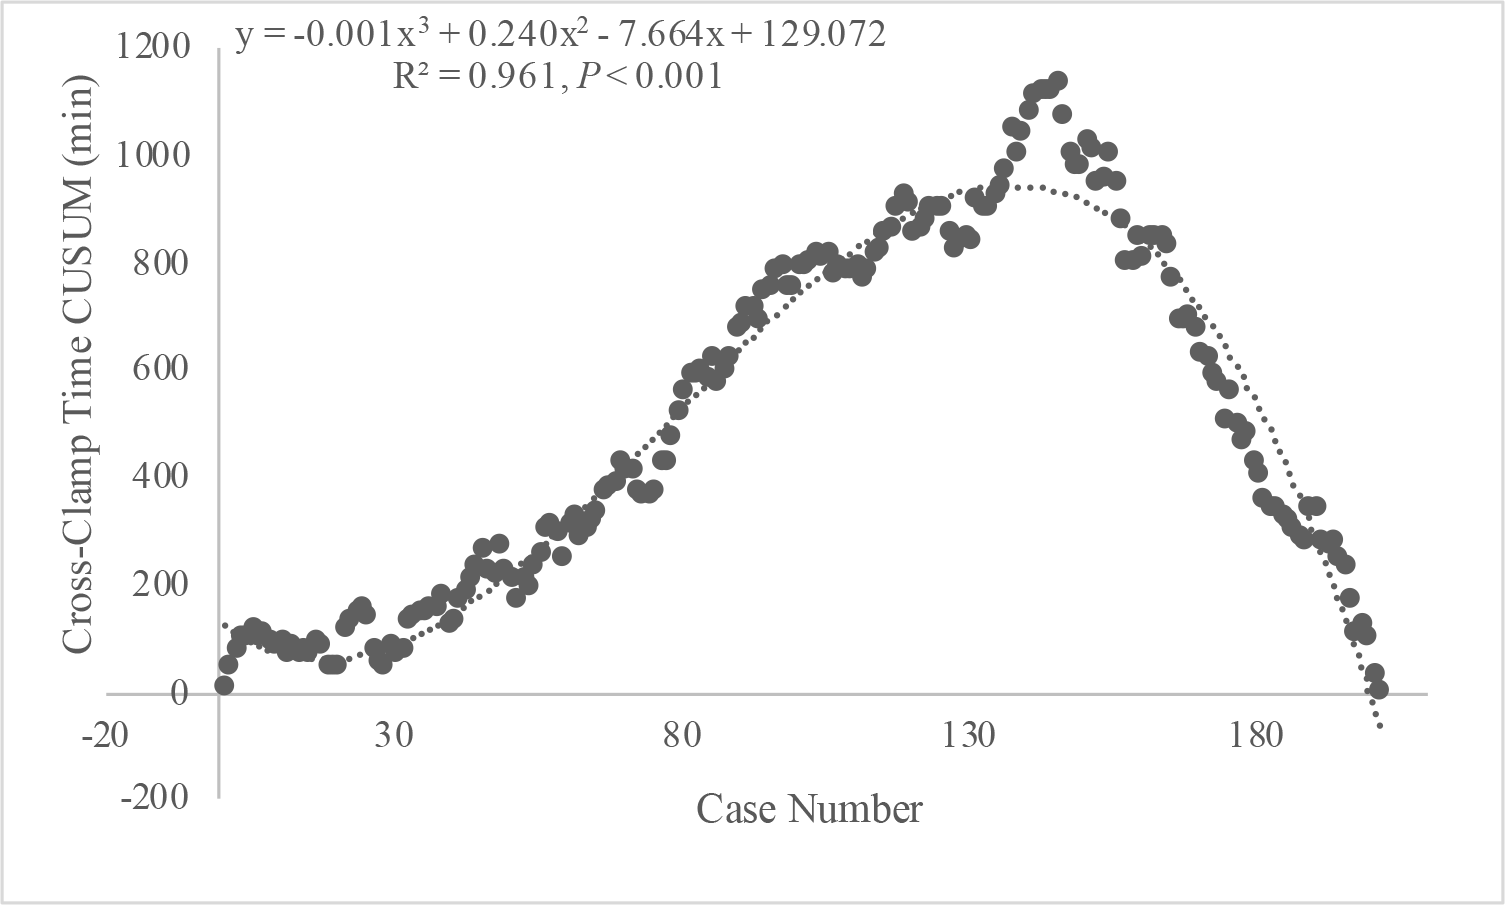


Supplementary Figure 1. CUSUM plots of cross-clamp time. *CUSUM*, Cumulative summation.


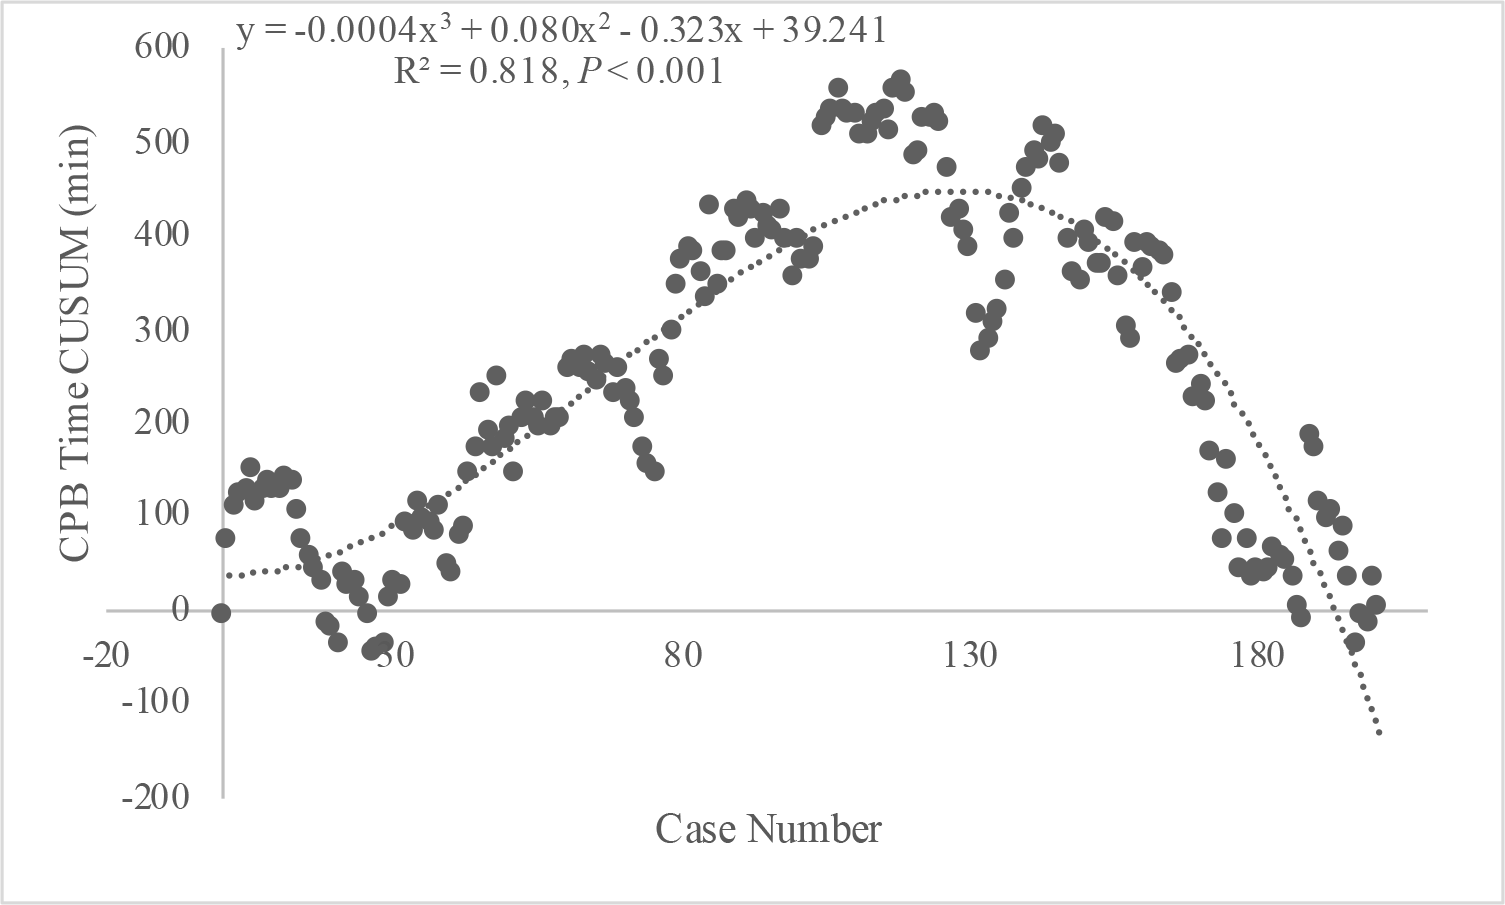


Supplementary Figure 2. CUSUM plots of CPB time. *CUSUM*, Cumulative summation; *CPB*, Cardiopulmonary bypass.
